# Supplementary material for: Endothelial Lipase Modulates Paraoxonase 1 Content and Arylesterase Activity of HDL
Source: MDPI journal article supplement (doi:10.3390/ijms22020719), 2021-01-13
Supplement: s1 [file s1]

A & D

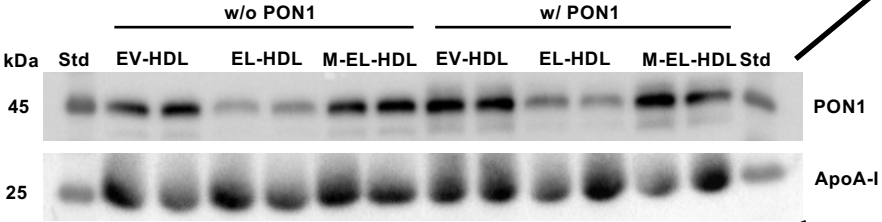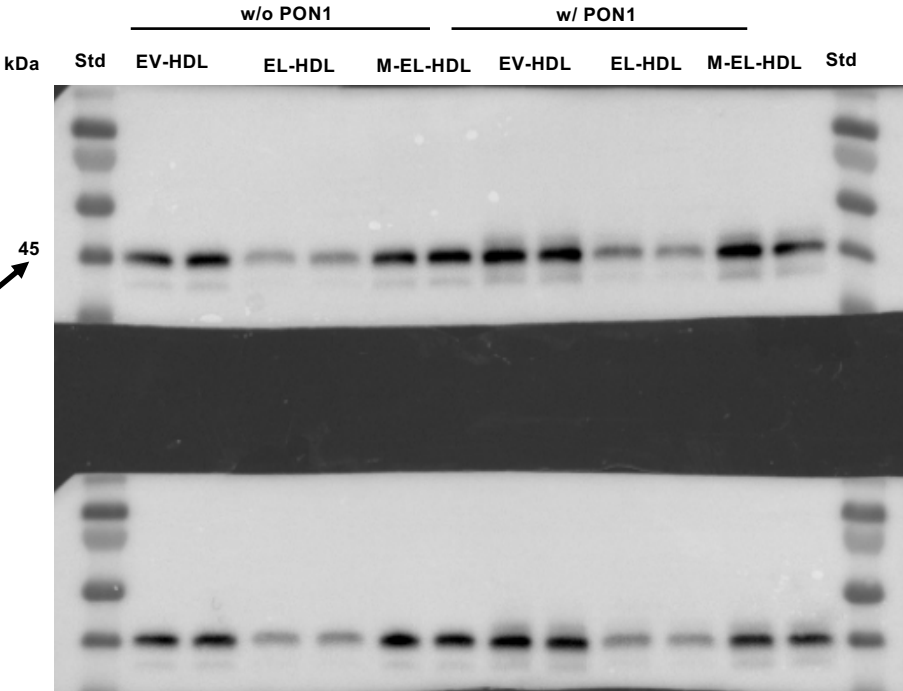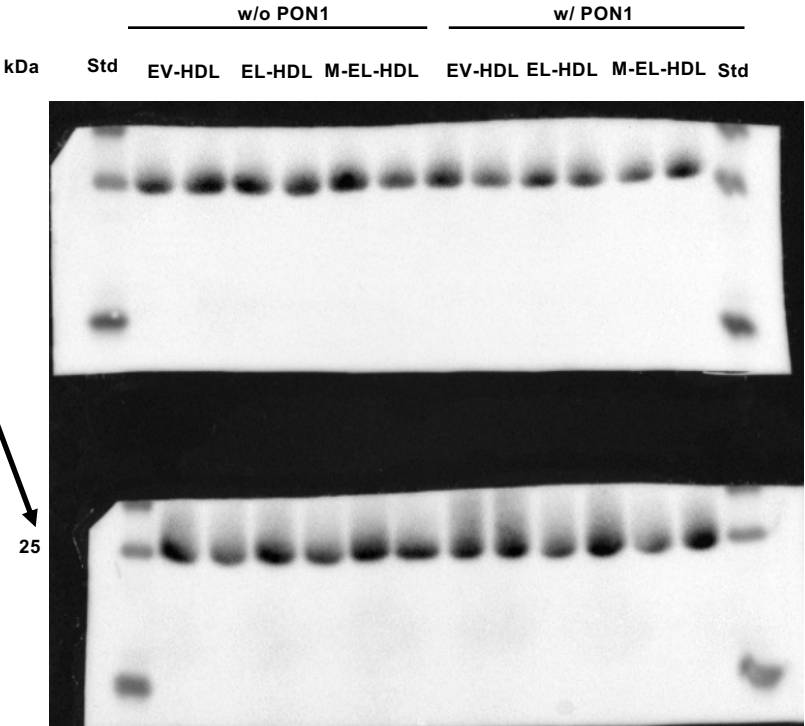

Fig. 1

C

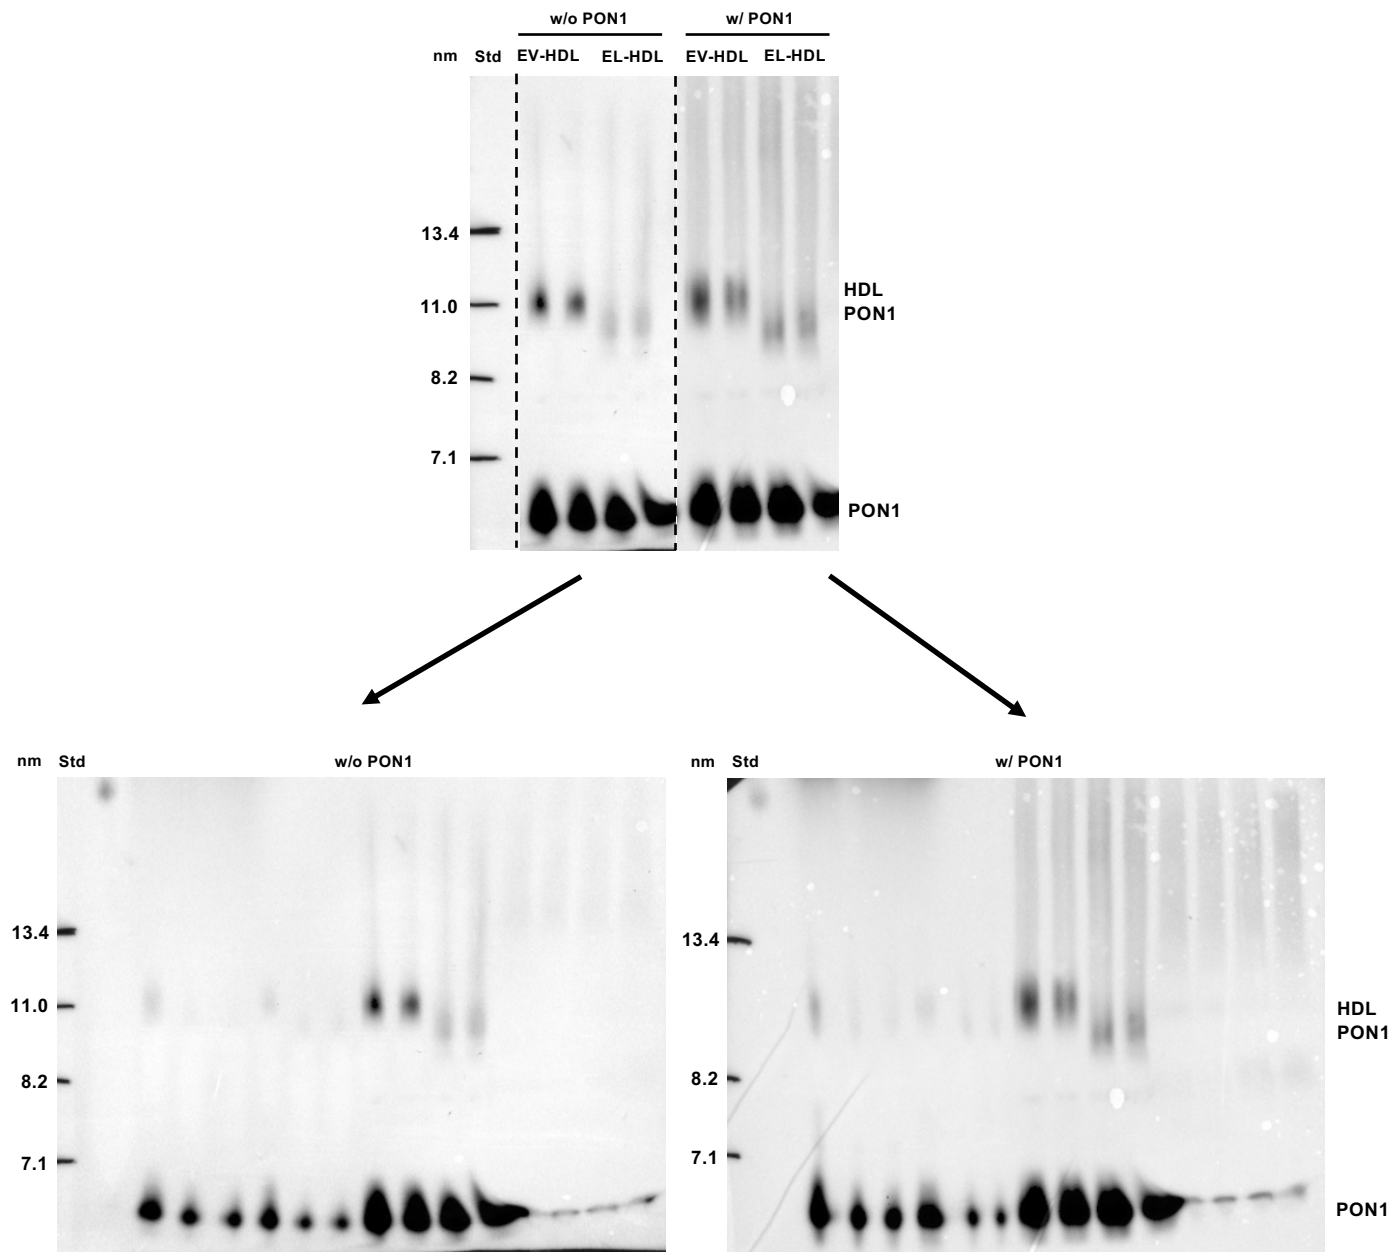

| Lane  | Sample         |                 |
|-------|----------------|-----------------|
| 1     | Std            |                 |
| 2     | EV-HDL w/o BSA | Isolated HDL    |
| 3/4   | EL-HDL w/o BSA |                 |
| 5     | EV-HDL w/ BSA  |                 |
| 6/7   | EL-HDL w/ BSA  |                 |
| 8/9   | EV-HDL w/o BSA | Modified medium |
| 10/11 | EL-HDL w/o BSA |                 |
| 12/13 | EV-HDL w/ BSA  |                 |
| 14/15 | EL-HDL w/ BSA  |                 |

Fig. 1

A

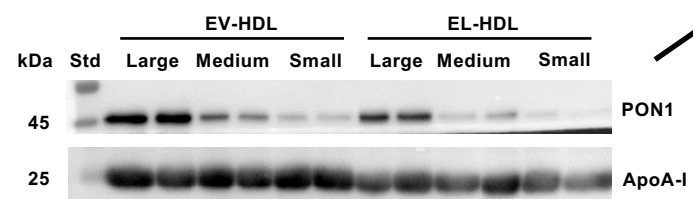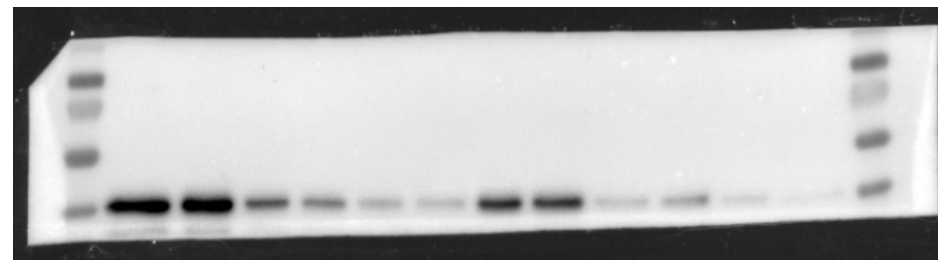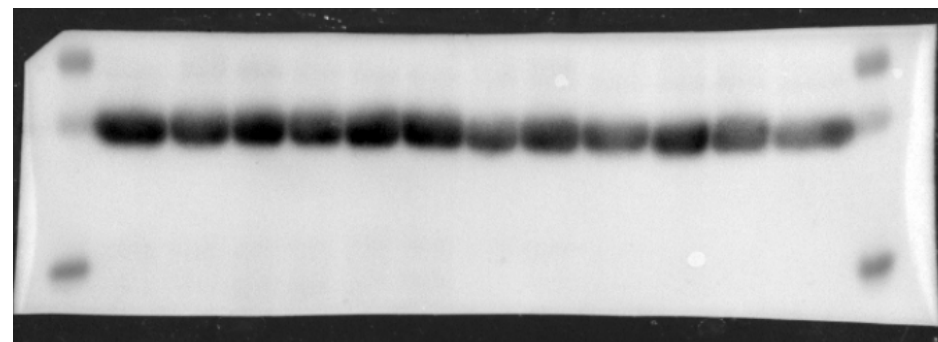

Fig. 2

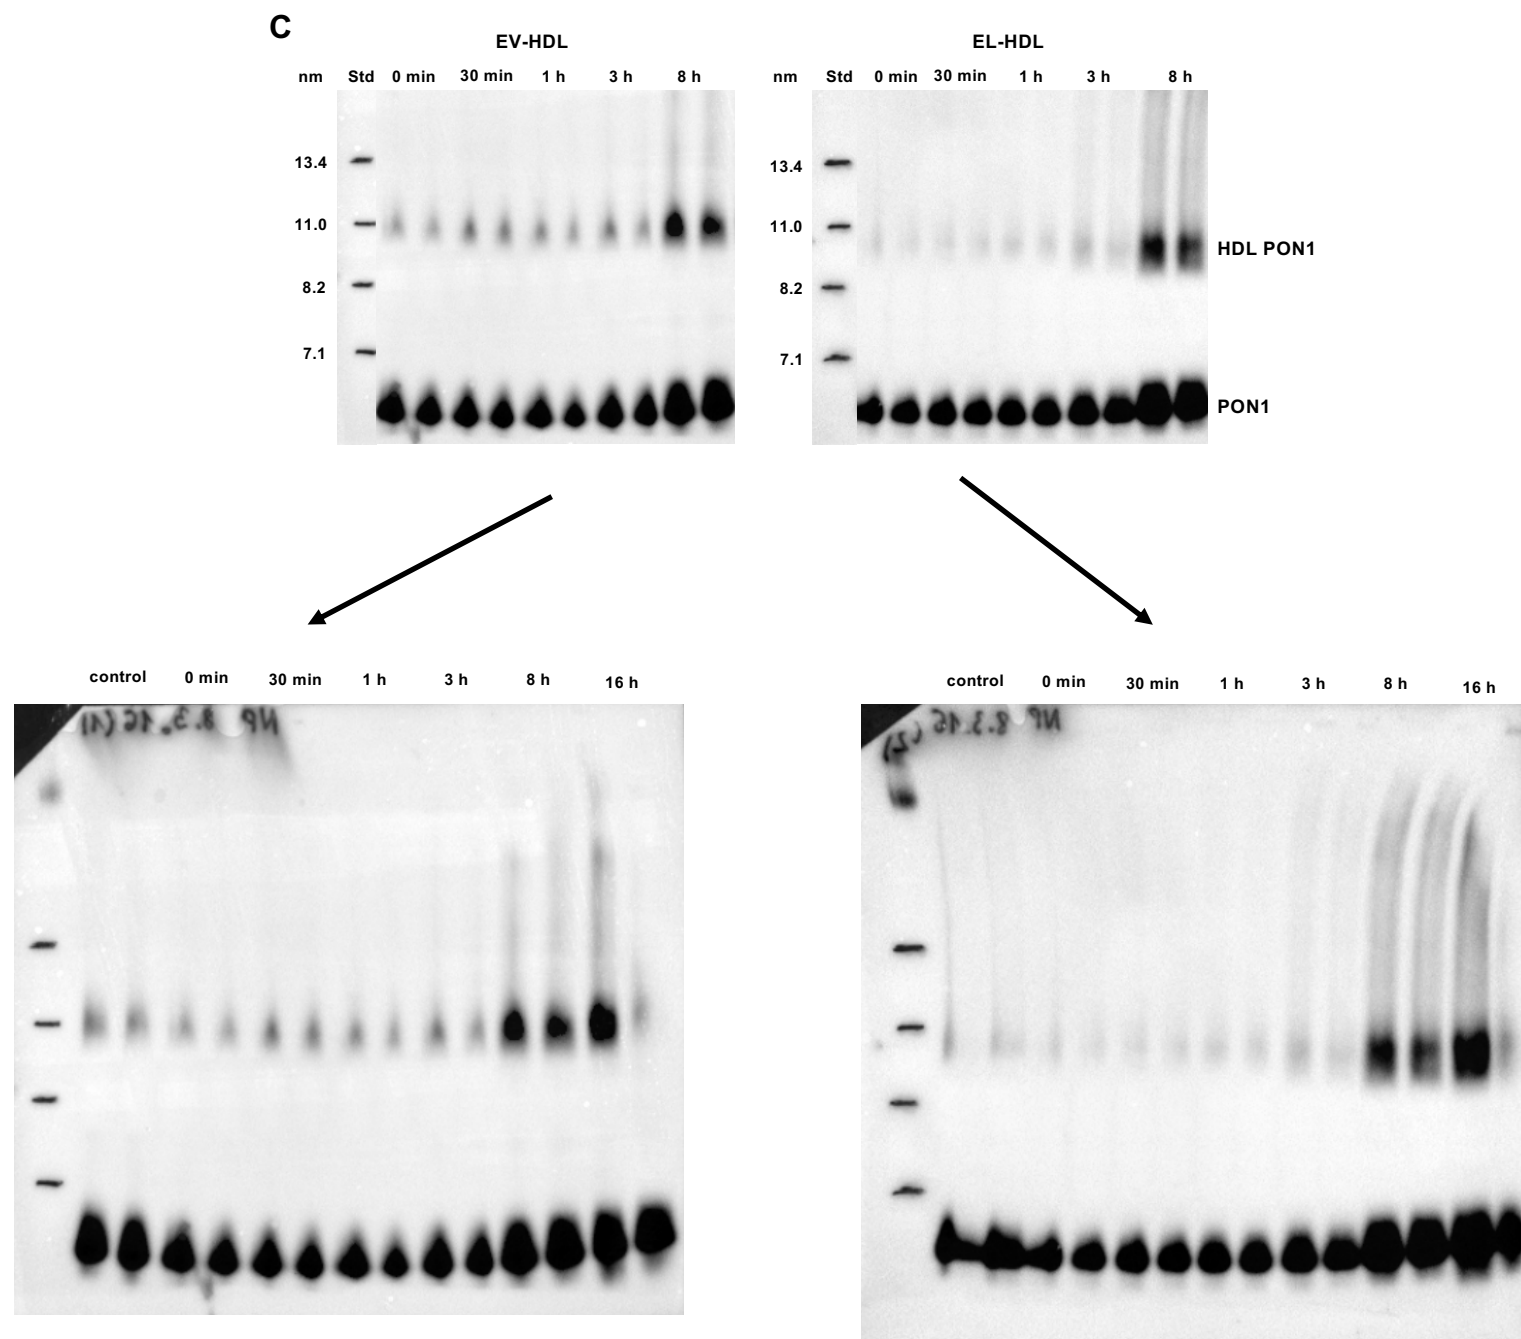

Fig. 2



**A**

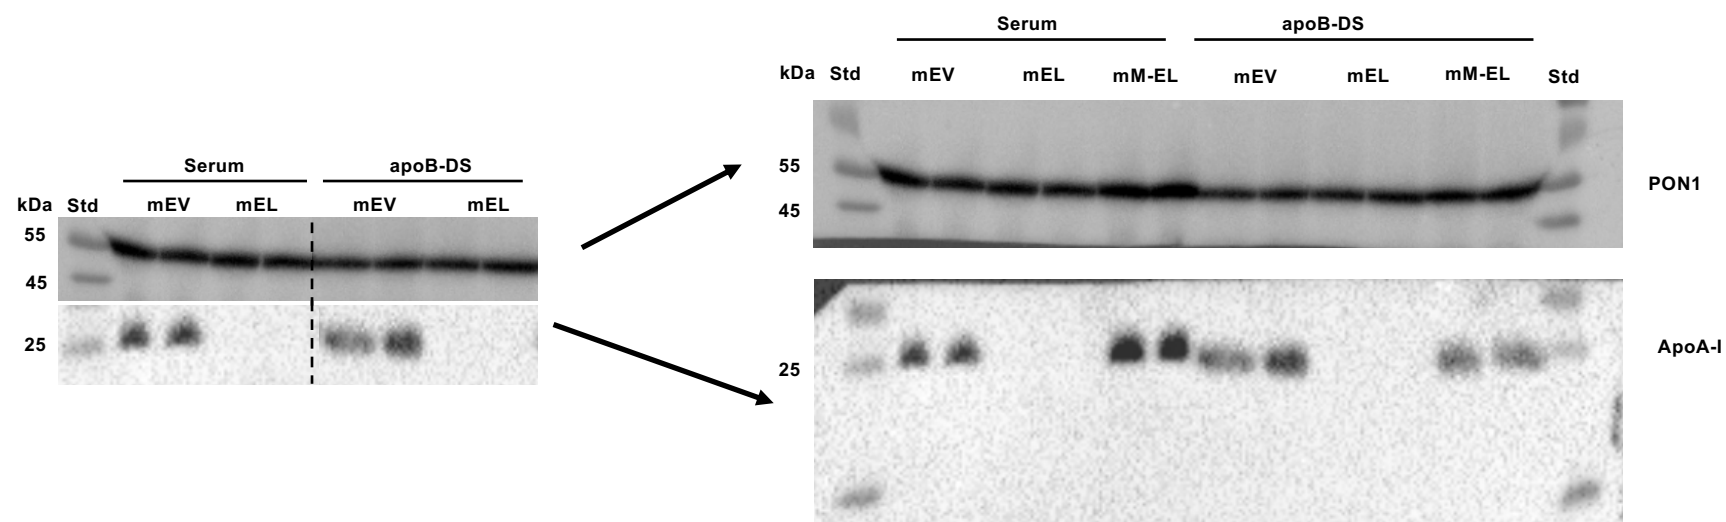

**D**

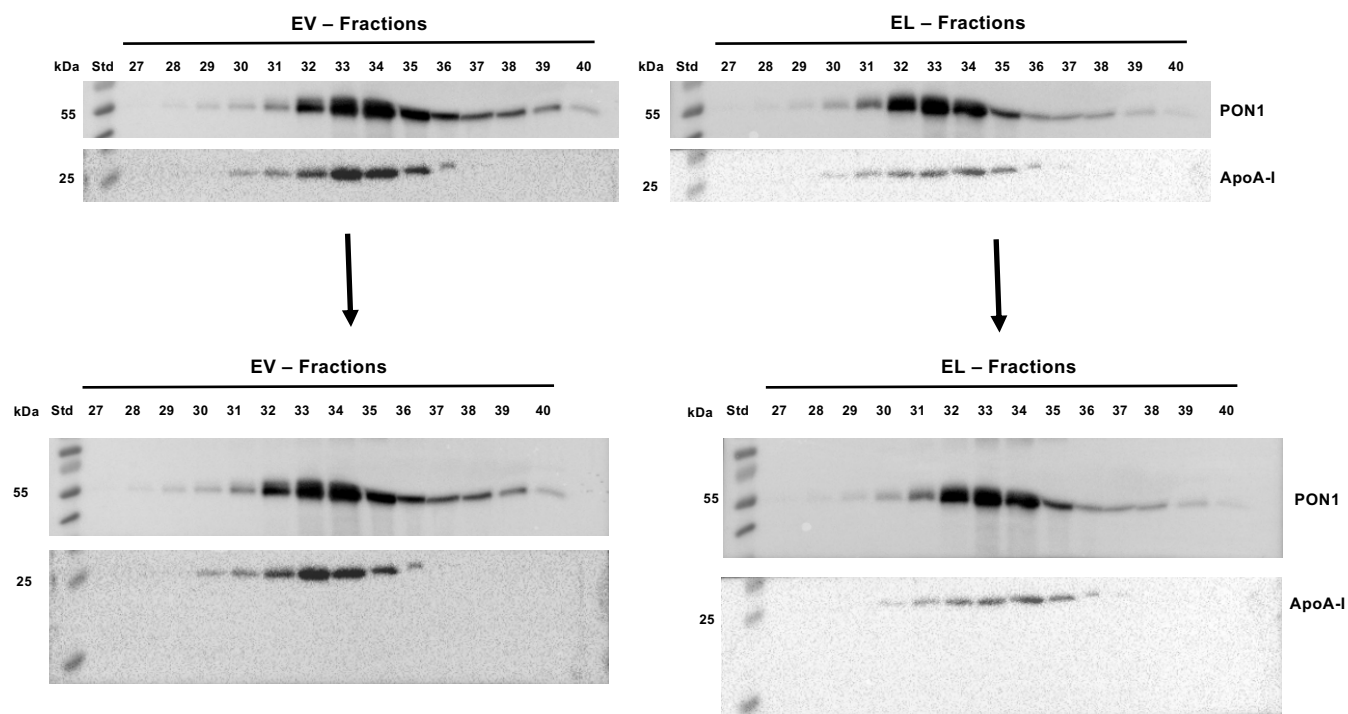

**Fig. 3**

**E**

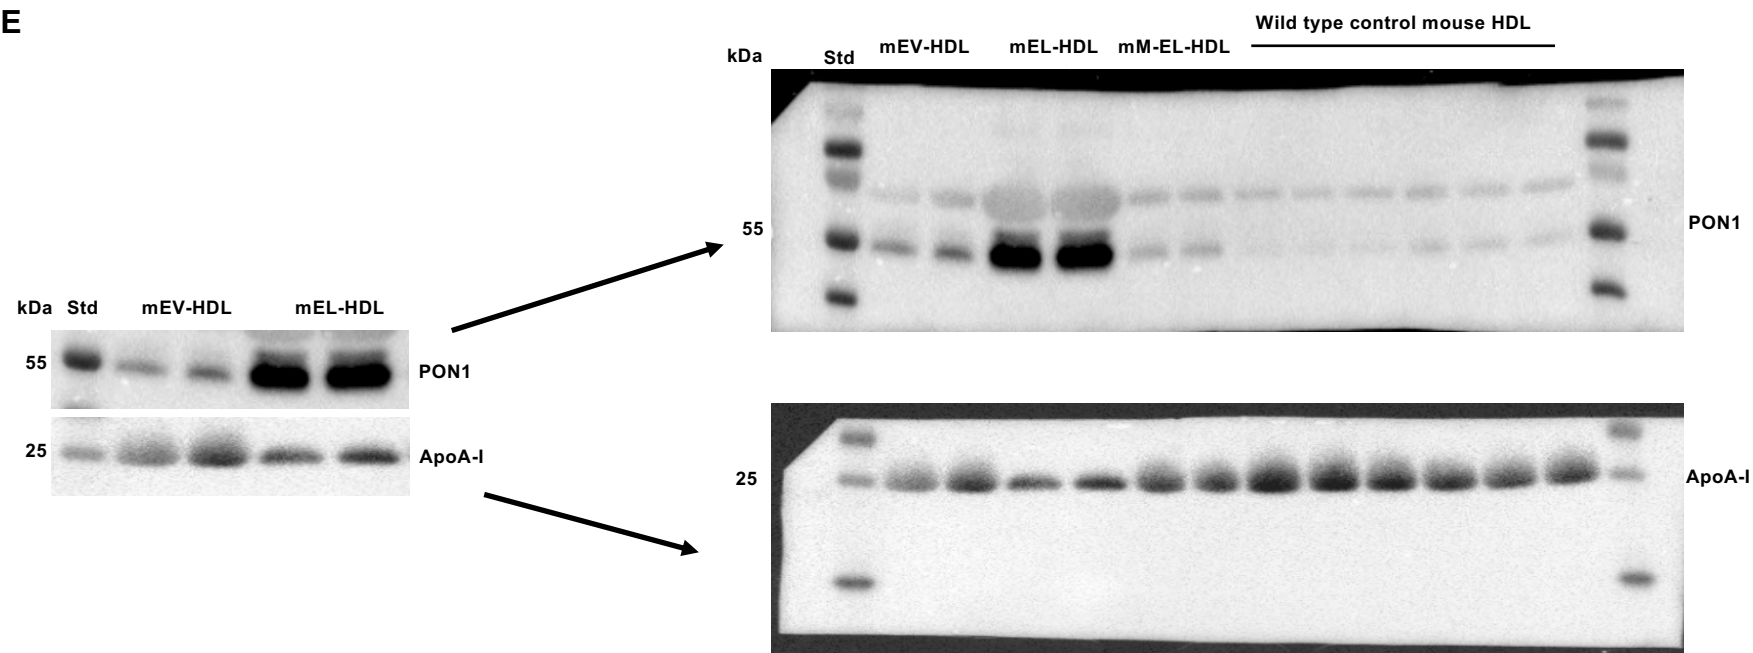

**Fig. 3**

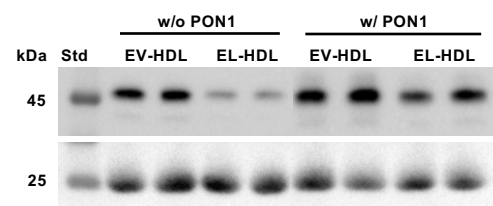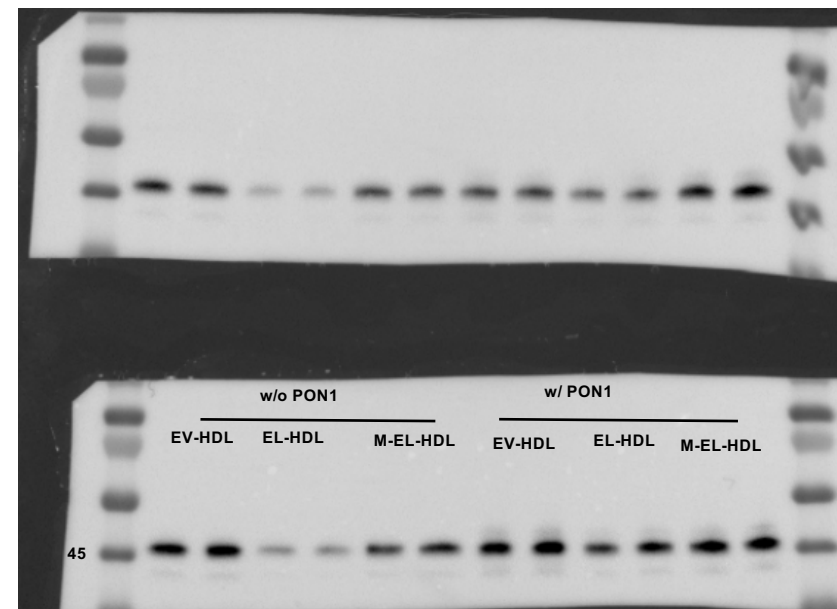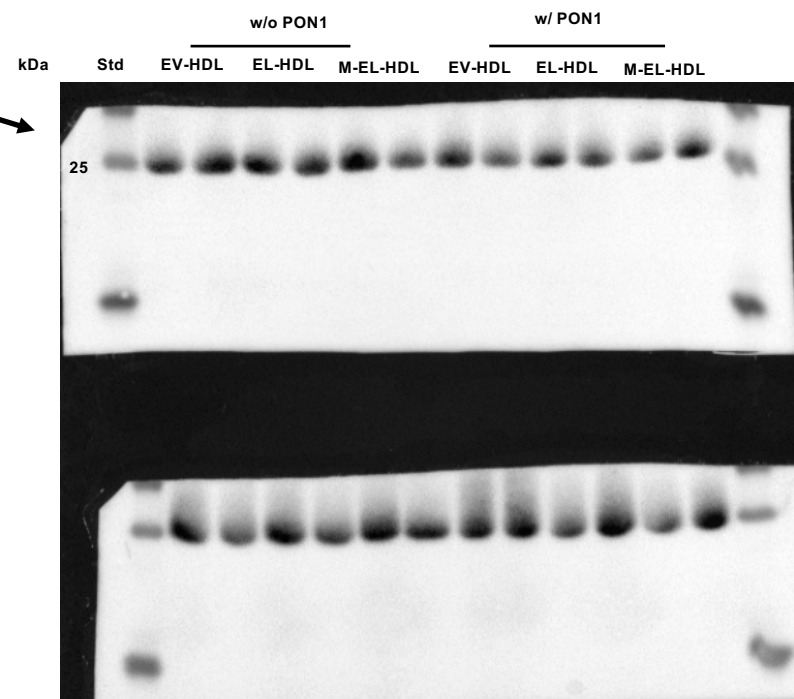

Figure S1

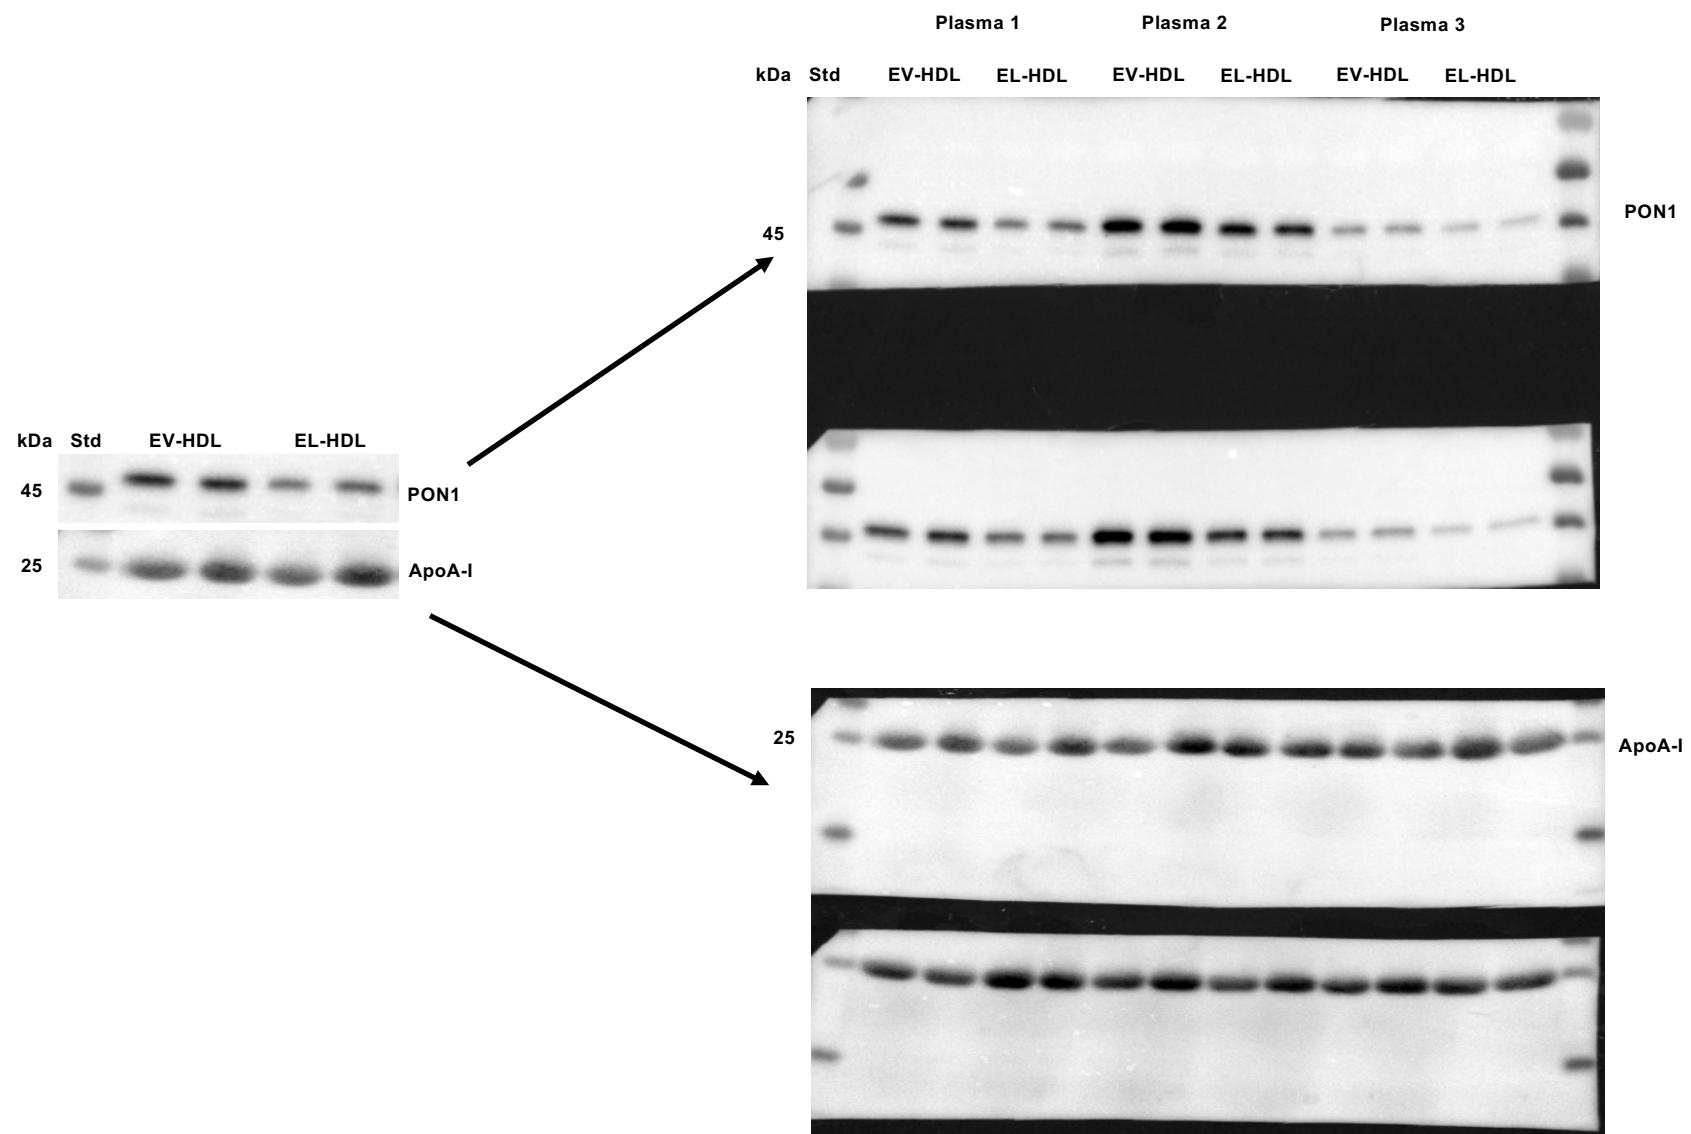

Figure S5

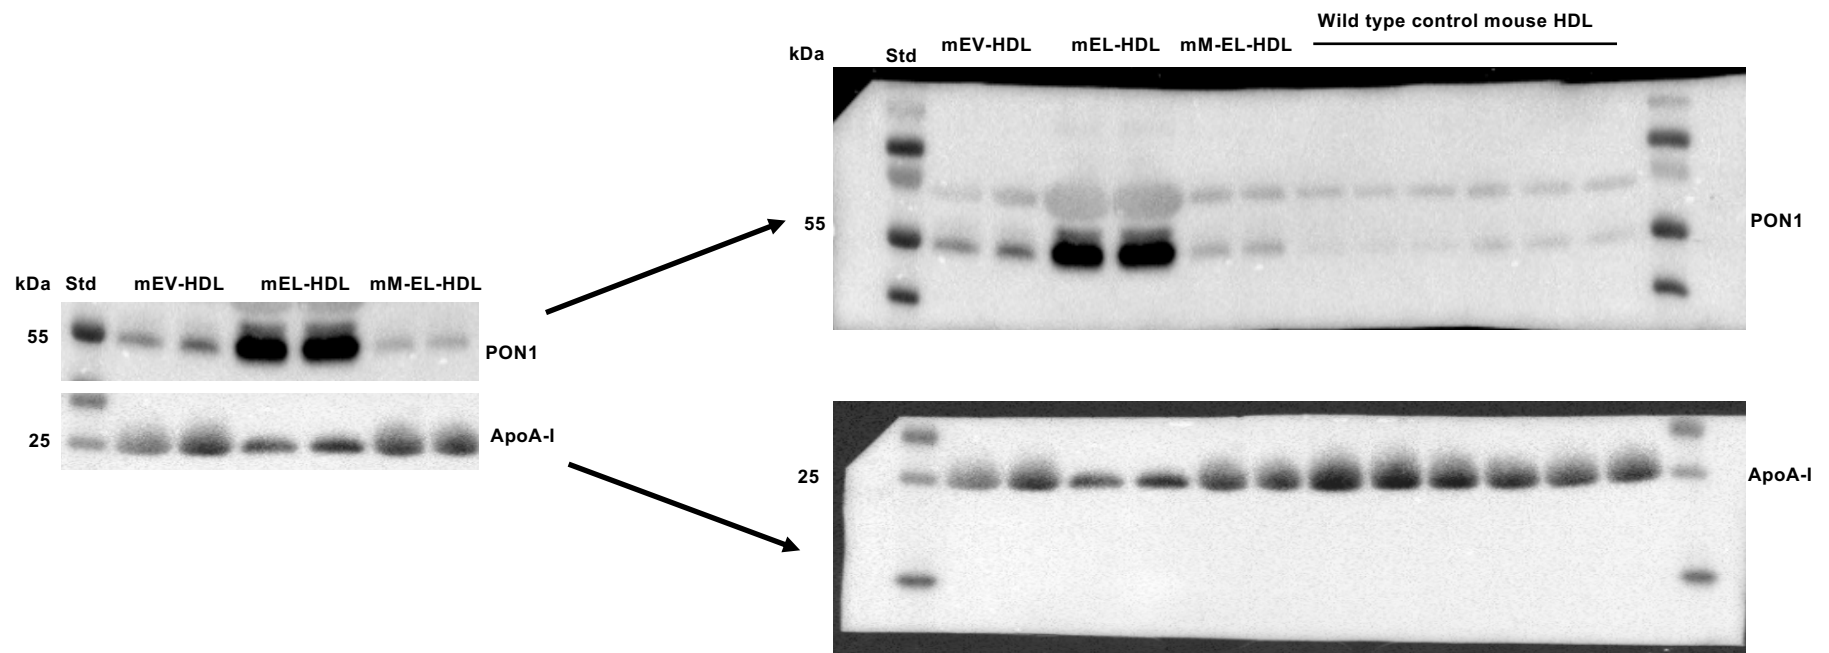

Figure S7
